# Supplementary material for: First reported case of Thunderstorm Asthma in Israel
Source: Copernicus journal article supplement (doi:10.5194/nhess-2019-137), 2019-04-30
Supplement: Supplementary file [file nhess-2019-137-AC3-supplement.pdf]

1 **First reported case of Thunderstorm Asthma in Israel**

2  
3 Yoav Yair<sup>1,\*</sup>, Yifat Yair<sup>2</sup>, Baruch Rubin<sup>2</sup>, Ronit Confino-Cohen<sup>3</sup>, Yosef Rosman<sup>3</sup>  
4 Eduardo Shachar<sup>4,&</sup> and Menachem Rottem<sup>5,&</sup>

5  
6 1 – Interdisciplinary Center (IDC) Herzliya, School of Sustainability, Israel

7 2 – Hebrew University of Jerusalem, Faculty of Agriculture, food and Environment, Rehovot, Israel

8 3 – Meir Medical Center, Kfar-Saba, Israel

9 4 - Rambam Medical Center, Haifa, Israel

10 5 – Ha'Emek Medical Center, Afula, Israel

11  
12  
13  
14  
15  
16 Submitted to

17 Natural Hazards and Earth System Sciences

18 April 2019

19  
20 Revised

21 September 2019

22  
23  
24  
25  
26  
27 **\*Corresponding author**

28 Prof. Yoav Yair

29 School of Sustainability, Interdisciplinary Center (IDC) Herzliya

30 P.O. Box 167 Herzliya 4610101 Israel

31 (p) +972-9-9527952 (m) +972-52-5415091 (f) +972-9-9602401

32 Email: yoav.yair@idc.ac.il

33

34 **Abstract.** We report on the first recorded case of thunderstorm asthma in Israel, that  
35 occurred during an exceptionally strong Eastern Mediterranean multicell-cell  
36 thunderstorm on October 25<sup>th</sup> 2015. The storms were accompanied by intensive  
37 lightning activity, severe hail, downbursts and strong winds followed by intense rain. It  
38 was the strongest lightning-producing storm ever recorded by the Israeli Lightning  
39 Detection Network since it began operations in 1997. After the passage of the gust front  
40 and the ensuing increase in particle concentrations, documented by air-quality sensors,  
41 the hospital emergency room presentation records from three hospitals – two in the  
42 direct route of the storm (Meir Medical Center in Kfar-Saba and Ha'Emek in Afula) and  
43 the other just west of its ground track (Rambam Medical Center in Haifa) showed that  
44 the amount of presentation of patients with respiratory problems in the hours  
45 immediately following the storm increased compared with the average numbers in the  
46 days before., This pattern is in line with that reported by Thien et al., (2018) for the  
47 massive thunderstorm asthma epidemic in Melbourne, Australia. The increase in patient  
48 presentations to the emergency rooms persisted for additional 48-72 hours before going  
49 back to normal values, indicating that it was likely related to the multi-cell outflow. We  
50 discuss how the likelihood of incidence of such public-health events associated with  
51 thunderstorms will be affected by global trends in lightning occurrence.

52

### 53 **1. Introduction.**

54 Thunderstorms and lightning are natural hazards, lethal and destructive with  
55 important implications on human societies. They are often accompanied by severe  
56 weather, hail and flash floods that entail significant economic and human losses (Yair,  
57 2018; Petrucci et al., 2019; Cooper and Holle, 2019). Public health effects of  
58 thunderstorms that are not related to direct lightning strikes of people may be the result  
59 of flooding, fallen trees, objects hurled by strong winds, impact of heavy hail, smoke  
60 from ignited forest fires and the consequences of disruptions to daily routines such as  
61 industrial accidents, loss of electricity, car accidents and limitation to air travel  
62 (Krausmann et al., 2011; Yair et al., 2018).

63 Research had shown that during the development stage of thunderstorms, updrafts carry  
64 surface aerosols and pollen particles into the cloud, where the high humidity and contact  
65 with liquid water causes pollen to rupture (Knox, 1993; Taylor et al., 2004a; Miguel et  
66 al., 2006; Vaidyanathan et al., 2006). At the mature stage of thunderstorm  
67 development, characterized by intense electrical activity and precipitation (typically

68 lasting tens of minutes), downdrafts carry such pollen fragments to the ground. When  
69 the downdrafts impinge on the surface they diverge and the outflow enhances the  
70 concentrations of airborne particles by causing uplift of additional concentration of  
71 pollen and dust particles into the air. If such outflows occur in dry desert areas, this  
72 often leads to the formation of well-known dust-wall known as "Haboob" that makes  
73 the gust front clearly visible and is portrayed in many Youtube videos (Williams et al.,  
74 2007). The gust front - the storm scale boundary caused by the outflow from the  
75 thunderstorm – quickly spreads and diverges from beneath it and propagates along the  
76 storm track. . The airborne pollen fragments and particles often release allergens in the  
77 size range < 2.5 micrometers that can be inhaled into the respiratory system and cause  
78 an acute allergic response. If occurring during the flowering season of specific plants,  
79 this may result in "*Thunderstorm Asthma*" epidemics (Bellomo et al. ,1992; Packe and  
80 Ayers, 1995; Venables et al., 1997; Wardman et al., 2002; Dales et al., 2003; D'Amato  
81 et al., 2016; 2017), which are expressed as severe respiratory problems, especially in  
82 sensitive populations (infants, senior citizens and people with prior allergic  
83 susceptibility). A thorough review of the present theories of thunderstorm asthma  
84 mechanisms is presented by Harun et al. (2019) and some unique cases are described  
85 below.

86 . Grass pollen is a well-known cause of hay-fever and allergic asthma, and has  
87 been implicated as the cause of two cases of thunderstorm asthma epidemics, in  
88 Melbourne (1987/1989) and in London (1994). Knox (1993) discuss the fact that grass  
89 pollen is too large to penetrate into the lower airways and trigger the allergic response  
90 and suggested that osmotic shock of caused by rainwater led to the rupture of grass  
91 pollen particles and the release of the major allergen Lol p 5;

92

93 **Figure 1:** A schematic  
94 description of the mechanism that  
95 enhances the concentrations of  
96 airborne aerosols (either pollution  
97 particles or pollen) ahead of a  
98 mature thunderstorm (Taylor and  
99 Jonsson, 2004).

100

101

102

103

104

105

106

107

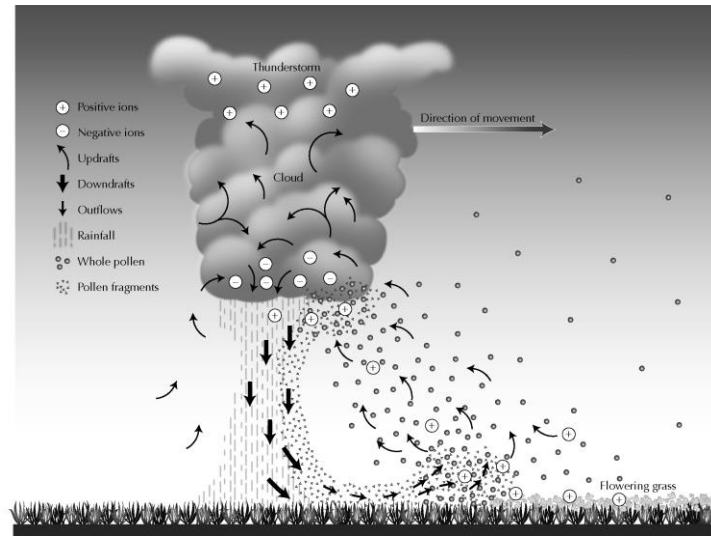

108

109

110

111

112

113

114

115

116

117

118

119

120

121

122

123

124

125

126

127

128

129

Nasser and Pulimood (2009) reviewed the role of fungal spores such as *Alternaria* in outbreaks of thunderstorm asthma and showed that the sudden increase in spore concentrations in the air following large-scale thunderstorm cold flows affects atopic, sensitized people, and may lead to asthmatic response. There are numerous reports from many countries about cases of thunderstorm asthma (Dabrera et al., 2012; Andrew et al., 2017; Beggs, 2017). For example, the Wagga-Wagga epidemic in Australia on October 30<sup>th</sup> 1997 led to 215 ER visits by asthmatic subjects with 41 hospitalizations, a fact that created an unusual burden on the health services there (Girgis et al., 2000). The most extreme case on record occurred in Melbourne, Australia, in November 2016 (Thien et al., 2018), when a thunderstorm asthma epidemic following a gust front induced by a multicell thunderstorm system resulted in more than 3000 presentations to Emergency Departments (ED) at hospitals for allergy and respiratory problems, with 10 fatalities (and see Table 1 in Harun et al., 2019). The allergic response of the population followed (or was prompted) by a chain-reaction commencing with the dynamics of the cold outflow from the thunderstorm. D'Amato et al. (2015) characterized the main aspects of thunderstorm-associated asthma epidemics (based on their Table 2): (a) The epidemics are limited to seasons when there are high concentrations of airborne allergenic and/or fungal spores (b) There is a close temporal association between the start of the thunderstorm and the onset of the epidemics. (c) There are not high levels of pollution related gasses and particles during the thunderstorm asthma outbreak (d) People who stay indoors with windows closed are not affected and (e) there is a major risk for subjects who are not optimally treated for

130 asthma; subjects with pollen-induced allergic rhinitis and without prior asthma are also  
131 at risk.

132 While this definition of thunderstorm asthma focuses on the allergic responses to  
133 airborne pollen or fungal spores, some reports consider other environmental factors  
134 such as humidity, temperature and pressure changes (Rossi et al., 1993; Ito et al., 1989).  
135 A chemical effect of lightning activity that may also play a role in thunderstorm asthma  
136 epidemics is the production of significant amounts of NO and O<sub>3</sub> near the surface.  
137 Ozone by itself is a potent oxidizer and is known to create severe respiratory response  
138 when inhaled (Molfino et al., 1991; Gleason et al., 2014). Indeed, Campbell-Hewson et  
139 al. (1994) considered several types of pollen and fungal spores, but also ozone  
140 concentrations and lightning, in the context of a thunderstorm asthma epidemic in  
141 Cambridge and Peterborough in southern England in June 1994. They reported an  
142 increase by a factor ~2 of ozone concentration (45 ppb compared with daily average of  
143 28.7 ppb) and high pollen counts before the rain and concluded that the causes of the  
144 epidemic were likely multifactorial. It should be pointed out that although there were  
145 37 lightning strikes in that region, the authors did not attribute the rise in ozone  
146 concentrations to lightning but rather to local pollution. This aspect of lightning activity  
147 was not considered in the present study.

148 A thorough review published by the World Allergy Organization (D'Amato et al.,  
149 2015) surveyed the expected changes in the occurrence of thunderstorm asthma and  
150 concluded that people with hypersensitivity to pollen allergy should be advised to stay  
151 indoors when there are clear indications that thunderstorm activity is expected. Such  
152 early-warning capabilities for lightning are becoming operational in some countries (for  
153 example the Lightning Potential Index [LPI] which is used in Weather and Forecasting  
154 Research model (WRF; Lynn and Yair, 2010; Lynn et al., 2012), but there seems to be  
155 a gap between forecasting lightning and administrating public-health warnings, and  
156 sensitive populations are not always effectively alerted when thunderstorms are  
157 expected.

158

## 159 **2. Data Sources**

160 We used data from various sources for studying possible correlations between  
161 meteorological conditions, lightning occurrence, aerosol concentrations, pollen counts  
162 and respiratory illnesses for central Israel.

- 163 a. Lightning data was obtained from the Israeli Lightning Detection Network  
164 (ILDN) operated by the Israeli Electrical Corporation (IEC). The system and its  
165 capabilities are described by Shalev et al. (2011).
- 166 b. Meteorological data – temperature, humidity, wind and pressure data were  
167 obtained from the Israeli Meteorological Service (IMS) for selected stations  
168 throughout the country.
- 169 c. Aerosol data – we used the PM<sub>2.5</sub> and PM<sub>10</sub> data that are collected routinely by  
170 the Ministry of Environmental Defense in Israel, that operates a national  
171 network of > 40 stations. These stations report particle concentrations at 5-  
172 minute intervals. That system also records Ground Level Ozone data.
- 173 d. Pollen data – The daily average pollen and spore concentrations (number/m<sup>3</sup>)  
174 were obtained from the Ted Arison Laboratory for Monitoring Airborne  
175 Allergens at Tel-Aviv University. The species are listed in Appendix 1.
- 176 e. Hospital presentationpresentation records for patients with respiratory  
177 symptoms of specific ICD codes at the Emergency Room (ER) were collected  
178 from 3 Israeli hospitals for a specific list of allergy-related illnesses. Approval  
179 of the internal Helsinki committee in each hospital were obtained. The long-  
180 term averages were obtained from hospital records to establish the baseline.

181

### 182 **3. Meteorological Conditions**

183 The synoptic condition leading to the unusual event described here are summarized  
184 by Razy et al. (2018) and will be briefly described below. During October 24<sup>th</sup> 2015 the  
185 eastern Mediterranean was dominated by a Red-Sea Trough (RST, Ben-Ami et al.,  
186 2014), a low-pressure region extending from the south along the Red-Sea northward to  
187 the eastern Mediterranean. This system transported tropical air toward Egypt, Jordan,  
188 Israel, Lebanon and Cyprus in the lower-levels (850 hPa). At the upper-levels (500  
189 hPa), a pronounced trough was situated with the axis slanted between Crete and  
190 Cyprus. This trough had two effects: one is a transport of tropical air by the south-  
191 southwesterly winds aloft and second is upward motion at the mid-levels, induced by  
192 positive vorticity advection ahead of this trough. Prior to the beginning of the storm, a  
193 cold front was noted west of the Israeli coast. At the same time a meso-scale cyclone  
194 was formed over the Sinai Peninsula and the southeastern Mediterranean, organizing  
195 the flow that advected moist air from the sea. During the morning hours of October 25<sup>th</sup>,  
196 the cyclone, together with the cold front, moved toward inland. Around 07 UTC this

197 multi-cellular cold front crossed central Israel, accompanied by extremely developed  
198 thunderclouds, with tops reaching 17 km height. The highly populated area of central  
199 Israel, extending from the coastal region inland, was subjected to torrential rains for 1-  
200 2 hours and large hailstorm with over 5cm diameter. Rain-gauge data obtained from the  
201 Israeli Meteorological Service show that in several places in central Israel the 10-minute  
202 rain rate exceeded  $100 \text{ mm h}^{-1}$  with a total of  $>50 \text{ mm}$  in the entire event (constituting  
203  $\sim 10\%$  of the annual average). The intensity of the storm can be attributed, at least  
204 partly, to the tropical nature of the warm air transported from south by the RST, ahead  
205 of the storm. The super-cell subsided upon reaching the Jordan rift in eastern Israel.  
206 The entire event caused 1 fatality, extensive flooding in several Israeli cities and  
207 agricultural damages. It also impacted the national electrical grid with power outages  
208 lasting up to 3 days in central Israel. This was the most powerful thunderstorm ever  
209 observed in Israel since the Israeli Lightning Detection Network (ILDN) became  
210 operational in 1997.

211 a. **Wind** – Based on the Israeli Meteorological Service data, the storm was  
212 typified by destructive south-westerly winds that exceeded  $25 \text{ m s}^{-1}$ , with gusts  
213 of  $>36 \text{ m s}^{-1}$ , which can be attributed to the downbursts from the active cells.  
214 Figure 2 presents wind speeds measured at several locations. The distance from  
215 Tel-Aviv coast (purple line) to Hadera port (red line) is approximately 40 km,  
216 indicating a very wide gust front that swept across central Israel together with  
217 the movement of the active cells. The sustained high winds lasted for more than  
218 two hours, and caused a significant increase in amounts of airborne particulate  
219 matter (see below).

220

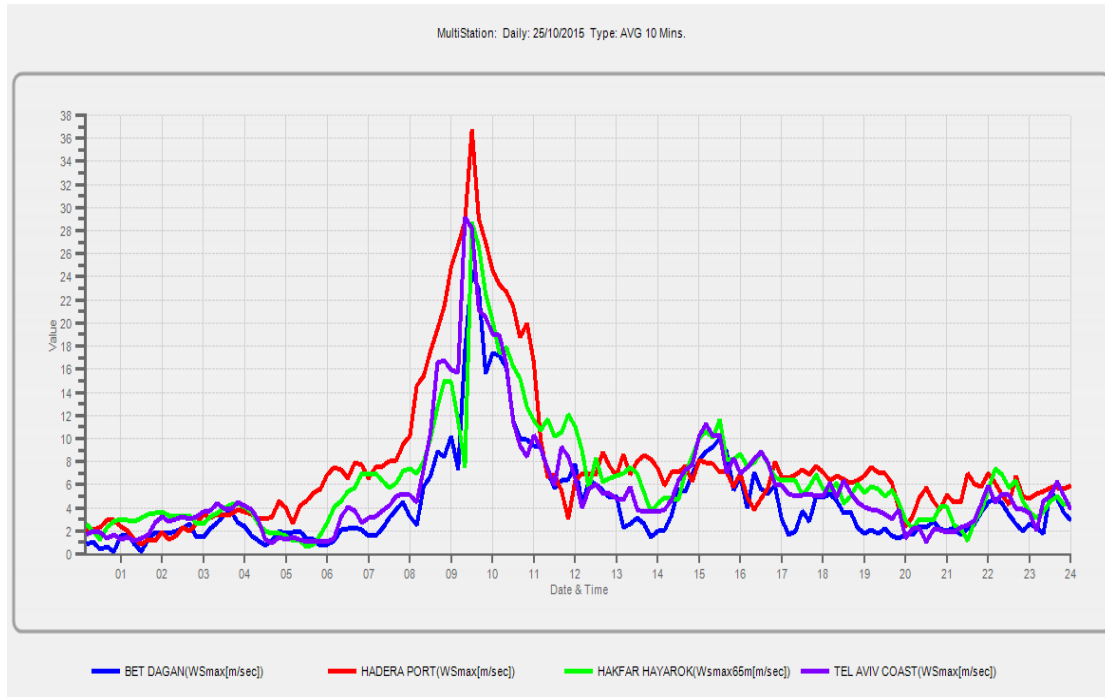

221

222

223 **Figure 2:** Wind speed at 4 different stations along Israel. Bet Dagan (in blue) is located 12 km southeast  
 224 of Tel-Aviv. Hadera Port (red) is located on the coastline, 45 km north of Tel-Aviv. Hakfar Hayarok  
 225 (green) is 5 km northeast of Tel-Aviv, and Tel-Aviv coast (purple) is located on the Mediterranean  
 226 coastline. All stations recorded an abrupt and short-lived increase in wind-speed around 10 AM local  
 227 time, indicating the passage of the gust front. Data courtesy the Israeli Meteorological Service.

228

229 **Electrical Activity** - More than 17,000 cloud-to-ground lightning strokes were  
 230 registered by the ILDN during this event, exceeding the annual total amount of  
 231 lightning strikes for the entire country (Figure 3b). As Figure 4 shows, at the  
 232 peak of the event the average cloud-to-ground flash rates between 090-0930 LT  
 233 were greater than 450 strokes per minute. One should consider that this is only  
 234 the Cloud-to-Ground (CG) flash rate as the ILDN does not record Intracloud  
 235 flashes (IC). If we accept the ratio of IC/CG~2 reported by Yair et al. (1998),  
 236 then the total flash rate would be more than 1000 flashes per minute, exceeding  
 237 the maximum global record of flash rates found in the Argentina-Paraguay  
 238 border (Zipser et al., 2006).



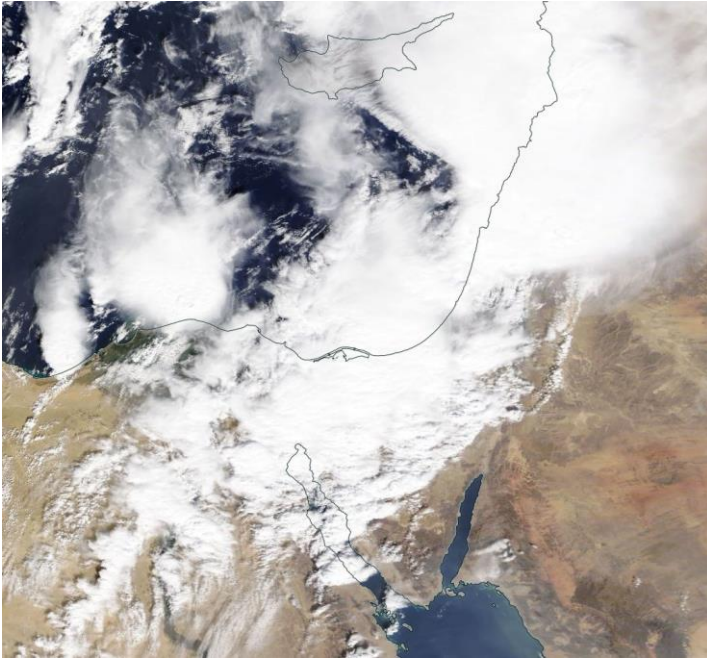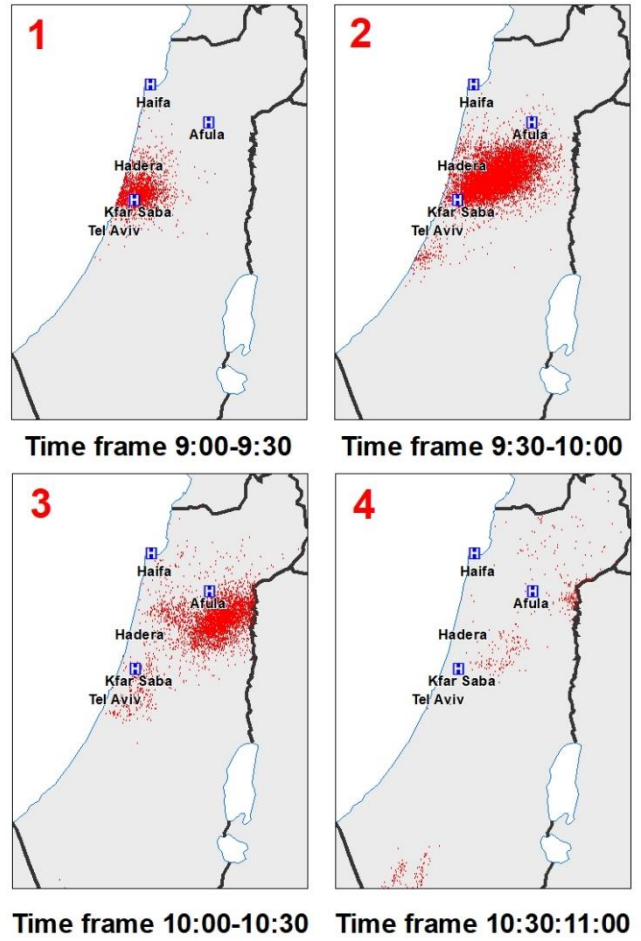

239  
240  
241  
242  
243  
244  
245  
246  
247  
248  
249

**Figure 3:** (left) Visible MODIS Satellite image at 12 UT when the cold front and thunderstorms already moved into Israel (right) Lightning strokes detected on October 25<sup>th</sup> 2015 by the ILDN (Israel Lightning Detection Network) operated by the Israeli Electrical Corporation. Each point is a ground stroke. The panels show cumulative values at 30 minutes intervals, local time indicated and the location of the 3 hospitals involved in this research.

250  
251  
252  
253  
254  
255  
256  
257  
258  
259  
260  
261  
262  
263

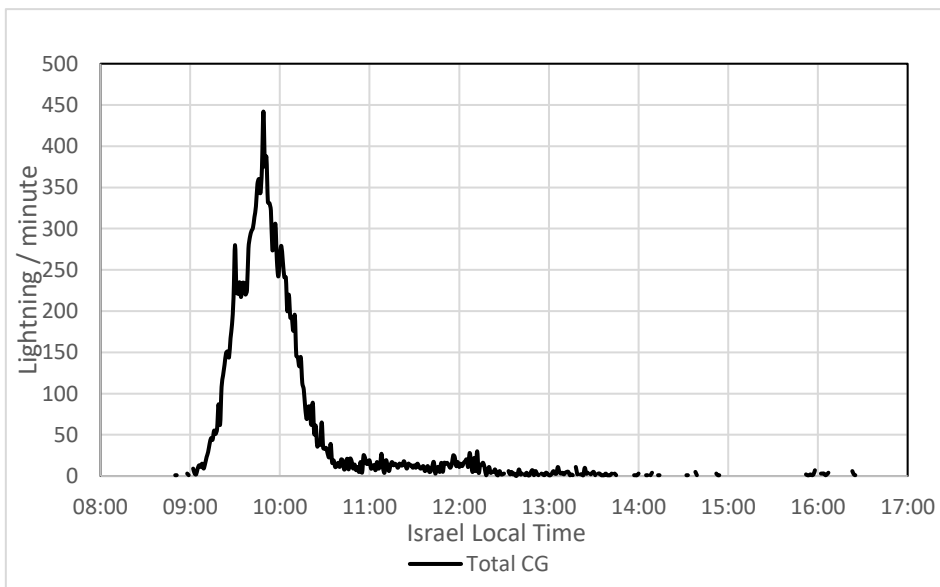

264

265 **Figure 4:** 1-minute accumulated lightning numbers detected on October 25<sup>th</sup> 2015 as a function of local  
266 time. The total cloud-to-ground stroke rate exhibits a sharp maximum around 09:45 local time, as the  
267 cells passed over central Israel.

268

#### 269 4. Particle Concentrations

270 The results from the Israeli Ministry for Environmental Protection's air-quality  
271 monitoring network show a remarkable increase in the concentrations of PM 2.5  
272 particles, up to 10-fold the normal values (Figure 5). This is due to the very strong winds  
273 ahead of the cells, that picked up considerable amounts of dust, pollen and other types  
274 of aerosols from the surface.

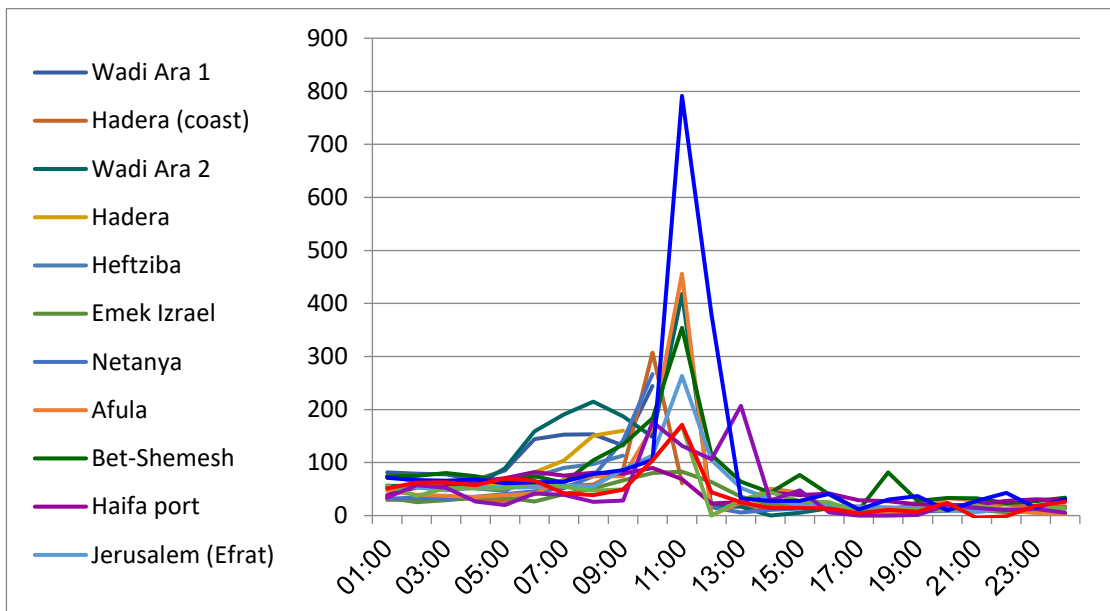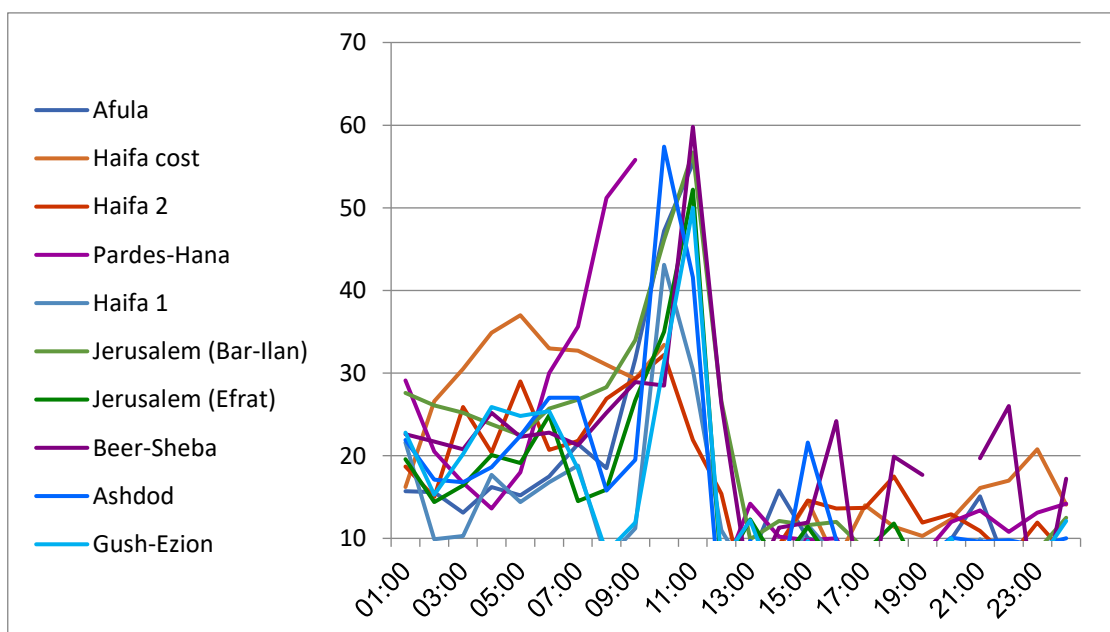

275

276

277 **Figure 5:** (a) Mass concentration of PM10 aerosols for several stations in central Israel, 25<sup>th</sup> October  
278 2015. Data is given in  $\mu\text{g m}^{-3}$ . Note the peak around 1100 local time, coinciding with the passage of the  
279 gust front. The sharp, strong peak was measured at the Rambam Medical Center in haifa. (b) The same as  
280 in (a), for PM2.5 aerosol concentrations.

281

282 The daily pollen amounts for October 2015 (Figure 6) exhibit two significant peaks,  
283 which are related to severe weather events. It should be noted that before the onset of  
284 the storm on October 25<sup>th</sup>, there were already larger than usual amounts of pollen and  
285 spores in the air (up be a factor of 3). This supports the thunderstorm asthma hypothesis  
286 of pollen processing inside the storm by humidity and electric fields, that results in  
287 rupture and release of allergens into the cold outflow (D'Amatto et al., 2015; Beggs,  
288 2017). The decrease in pollen concentrations after the storm is explained by washout  
289 and dilution after the rain and winds associated with passage of the active cells. The list  
290 of flowering allergenic plants in October in Israel is presented in Appendix A.

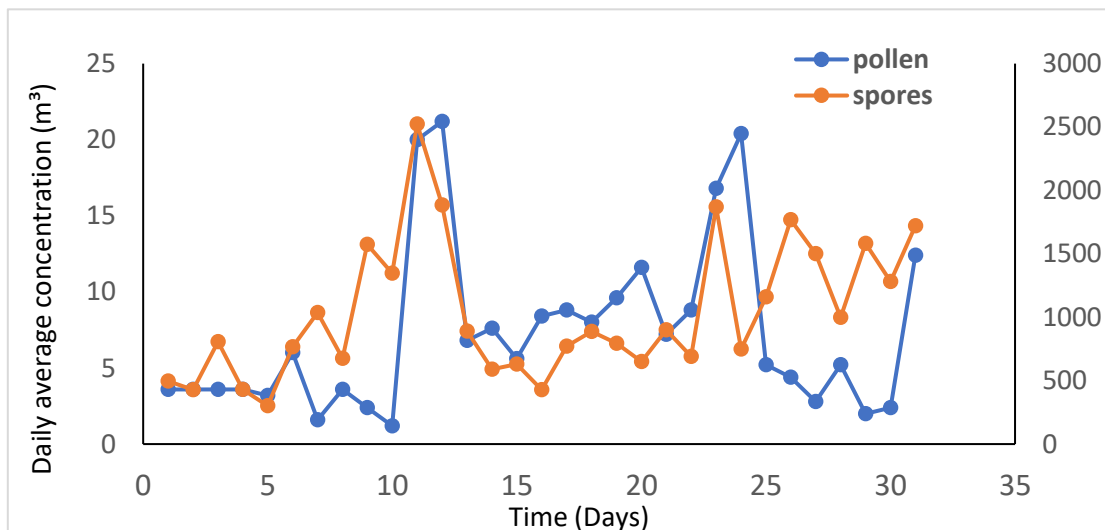

291

292 **Figure 6:** Daily average concentrations of pollen and spore numbers for October 2015, based on  
293 data collected at Tel-Aviv University's monitoring station in the botanical gardens on campus (Data  
294 courtesy of Prof. Amram Eshel, the Laboratory for Pollen Monitoring, Tel-Aviv University).

295

## 296 5. Hospital ER presentations

297 The hospital presentation records of patients with respiratory problems were  
298 obtained from three Israeli hospitals. The Meir Medical Center is located in the city of  
299 Kfar-Saba (population 110,000), 15 km north-east of Tel-Aviv in the central coastal  
300 plain. The Ha'Emek Medical Center is located in the city of Afula (population 43,000),  
301 a regional urban center located in an agricultural and rural part of northern Israel, close

302 to Mt. Tabor. The Rambam Medical Center is located in Israel's largest port city of  
303 Haifa (population 280,000) and is the largest of the three. Figure 7 shows the records  
304 of a full week with numbers of patients, starting 3 days before the event. The ER  
305 presentation records show that the numbers of presentations of patients on October 25<sup>th</sup>  
306 increased compared with the numbers of the days before the storm. Although in  
307 absolute numbers the numbers may seem low, the values admitted on the day of the  
308 thunderstorm represent a clear deviation from monthly average for October. At the Meir  
309 (located just below the ground-track of the storm cells) and Rambam (located west of  
310 the ground-track) hospitals there was a clear increase in the number of ER presentations  
311 which can be related to the passage of the gust-front in the surrounding areas and the  
312 ensuing increase in particle concentrations. Based on records of arrival times at the ER,  
313 we noted that within several hours after the thunderstorm there was a noticeable  
314 increase in the number of patients with respiratory problems of a specific nature (a list  
315 of diagnoses only related to asthma and allergic respiratory diseases), in line with the  
316 pattern reported by Newson et al. (1997) and Thien et al., (2018). At the Ha'Emek  
317 medical center in Afula there was no significant increase and the numbers were  
318 practically the same as the day before. In all three hospitals, this increase in patient  
319 presentation to the ER with respiratory problems persisted for 24 hours and a clear  
320 decline was noticed in the following day, likely related to a wash-out effect by  
321 precipitation that followed the passage of the active cells. This decline was more  
322 pronounced at the Meir and Ha'Emek hospitals which experienced heavy rains during  
323 of the storm, lasting for 48 hours. At the Rambam Medical Center in Haifa the numbers  
324 of ER presentations with respiratory problems rose again to high values, likely due to  
325 the ambient values of air pollution related to aerosols in the Bay of Haifa, a well-known  
326 source of industrial emissions (Sa'aroni et al., 2018).

327

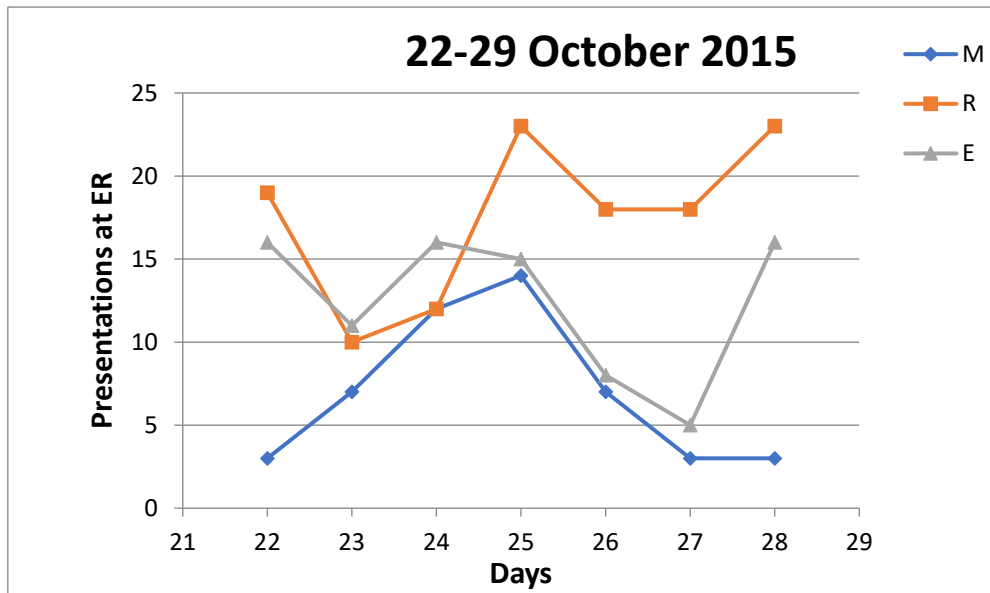

328 **Figure 7:** Emergency room presentations at 3 Israeli hospitals in the 3 days preceding and following the  
 329 October 25<sup>th</sup> 2015 super-cell event: M = Meir Medical center (blue), R = Rambam medical center  
 330 (orange), E = HaEmek medical center (grey).  
 331  
 332

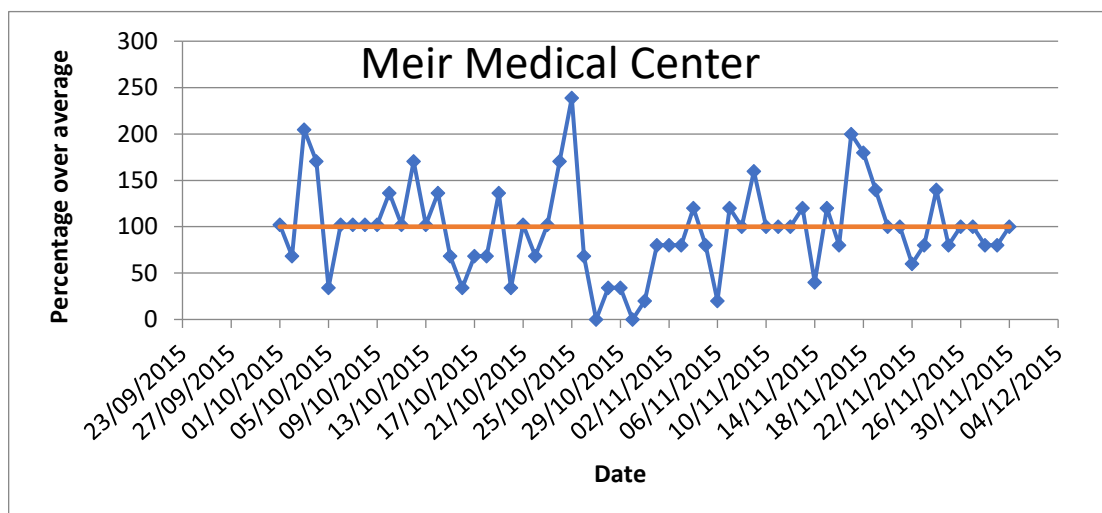

333 **Figure 8:** Two months of ER presentations of patients with respiratory problems at the Meir Medical  
 334 Center in Kfar-Saba, central Israel (for the period 1.10.2015-30.11.2015). The October 25<sup>th</sup> record shows  
 335 a 250% increase above the long-term average in a single day.  
 336

### 337 6. Discussion

338 In most reported cases of thunderstorm asthma in Europe, Canada, US and  
 339 Australia, the initiating agents were spring or summer convective storms, and their  
 340 occurrence coincided with the flowering season of many plant species whose pollen is  
 341 known to be highly allergenic. In Israel, thunderstorms and lightning occurs mainly  
 342 during winter months ((December-January-February) and are associated with the  
 343 passage of Cyprus Lows or Red-Sea Trough [RST] (Ziv et al., 2008; Shalev et al., 2011;

344 Yair et al., 2014; Ben-Ami et al., 2015). During these months there is little flowering  
345 and pollen concentrations are low (Keinan, 1992). However, some of the most severe  
346 convective events in Israel occur during fall and spring months, when the RST pressure  
347 system transports mid-level moisture into the eastern Mediterranean and the  
348 atmosphere is unstable, enabling deep convection and intense lightning activity. These  
349 events occur mostly in October-November and March-May, and coincide with  
350 flowering of various allergen-bearing plant species, for example *Ambrosia* spp. (Waisel  
351 et al., 1997; Waisel et al., 2008; Appendix A), and so have the potential to instigate  
352 thunderstorm-asthma epidemics.

353 The October 25<sup>th</sup> 2015 super-cell event was by far one of the strongest thunderstorm  
354 episodes ever recorded in Israel. The unique synoptic circumstances of this event  
355 coincided with massive flowering of *Ambrosia* spp. already shown to be highly  
356 allergenic and wide-spread in central Israel (Yair et al., 2017; 2018). Previous studies  
357 suggested that the mechanism by which thunderstorm dynamics recycle ambient  
358 aerosols is very effective in releasing allergens from pollen particles, that may  
359 otherwise not reach and affect sensitized populations (Taylor and Jonsson, 2004;  
360 D'Amato et al., 2015). The strong electric fields that existed during that thunderstorm,  
361 manifested by the high flash rate, as well as the high humidity and presence of rain,  
362 likely aided in rupturing the pollen membranes and enriching the air with respirable  
363 allergens, that accompanied other aerosol particles already present in the environment.  
364 The track of the storm passed directly above the densely populated, mostly urban part  
365 of Israel, where the ambient concentrations of pollution particles was already high.  
366 Additionally, as the spore counts indicate (Figure 6), the background levels of fungal  
367 spores, that may play an important role in triggering allergic asthma (Packe and  
368 Ayers, 1986; Dales et al., 2003), was high the day before the storm. Thus, it was the  
369 convergence of several factors on the particular day that initiated the observed increase  
370 in ER respiratory presentations. Admittedly, the public health data presented in this  
371 study is limited, but follow-up research being presently conducted will help us to  
372 understand the characteristics of admitted patients (as performed by Thien et al., 2018).

373 What can be done to protect sensitized populations against thunderstorm  
374 asthma, especially in light of the emerging trends of thunderstorm frequency (Romps  
375 et al., 2016; Brooks, 2013; Diffenbaugh et al., 2013; Yair et al., 2018), the extended  
376 period of plant flowering (Ziska et al., 2011) and the increase in allergen content in  
377 pollen (Singer et al., 2005) in a warmer climate? A thorough review published by the

378 World Allergy Organization (D'Amato et al., 2015) surveyed the expected changes in  
379 the occurrence of thunderstorm asthma and concluded that people with hypersensitivity  
380 to pollen allergy should be advised to stay indoors when there are clear indications that  
381 thunderstorm activity is expected. Silver et al. (2018) examined the seasonality and  
382 predictability of asthma-related presentation at Melbourne hospitals, using time-series  
383 ecological approach. They suggest that the observed spring peak in asthma patient  
384 numbers may be related to thunderstorm asthma as they are associated with rainfall,  
385 high humidity, and enhanced grass pollen levels, but the rarity of such events  
386 undermines predictive capabilities. Indeed, early-warning capabilities for lightning are  
387 becoming operational in some countries (for example the Lightning Potential Index  
388 [LPI] calculated from the microphysical fields of numerical models such as the WRF  
389 and which is being used for medium-range weather forecast models; Lynn and Yair,  
390 2010; Lynn et al., 2012) and pollen forecast models are also used to predict the onset  
391 and spread of pollen concentrations (Sofiev et al., 2013; Zhang et al., 2014). However,  
392 there seems to be a gap between a combined forecasting procedure of pollen and  
393 lightning and administrating public-health warnings, and thus sensitive populations  
394 may not be effectively alerted. We therefore suggest to include proper public health  
395 alerts when there is clear indication for the coincidence of thunderstorms during plant  
396 flowering season in specific regions where allergenic species are found.

397

398

399

400 **Acknowledgment:** This research is supported by the Israeli Science Foundation and  
401 the National Chinese Science Foundation grant 2460/17. Pollen data courtesy Prof.  
402 Amram Eshel, Tel-Aviv University. Lightning data obtained from the Israeli Electrical  
403 Corporation (IEC). We wish to thank Dr. Nurit Keinan for her kind help with Appendix  
404 A.

405 & - E. Shachar and M. Rotem contributed equally to this work.

406

#### 407 **References**

408 Beggs, P. J. (2017). Allergen aerosol from pollen-nucleated precipitation: A novel  
409 thunderstorm asthma trigger. *Atmos. Environ.*, 152, 455-457.

410 Bellomo R, Gigliotti P, Treloar A, Holmes P, Suphioglu C, Singh MB, and Knox  
411 RB. (1992). Two consecutive thunderstorm associated epidemics of asthma in the city  
412 of Melbourne. *Med. J. Aust.*, 156, 834–837.

413 Ben-Ami, Y., Altaratz, O. Yair Y. and Koren, I. (2015). Lightning characteristics  
414 in Eastern Mediterranean thunderstorms during different synoptic systems. *Nat. Haz.*  
415 *Earth Syst. Sci.*, 15, 2449–2459. doi:10.5194/nhess-15-2449-2015

416 .

417 Brooks, H. E. (2013). Severe thunderstorms and climate change. *Atmos. Res.*, 123,  
418 129-138.

419 Cooper M.A. and R. L. Holle (2019) How to make baseline studies of lightning  
420 deaths and damages. In: *Reducing Lightning Injuries Worldwide*. Springer Natural  
421 Hazards. Springer. pp 150-163, doi:10.1007/978-3-319-77563-0\_15

422 Dabrera, G., Murray, V., Emberlin, J., Ayres, J. G., Collier, C., Clewlow, Y., and  
423 Sachon, P. (2012). Thunderstorm asthma: an overview of the evidence base and  
424 implications for public health advice. *QJM: International J. Medicine*, 106(3), 207-217.

425 D'Amato, et al. (2015). Meteorological conditions, climate change, new emerging  
426 factors and asthma and related allergic disorders. A statement of the World Allergy  
427 Organization. *WAO J.*, 8, 25-52. DOI 10.1186/s40413-015-0073-0.

428 D'Amato, G, Vitale, C., D'Amato, M., Cecchi, L., Liccardi, C., Molino, A.,  
429 Vatrella, A., Sanduzzi, A., Maesano, C. and Annesi-Maesano, I. (2016). Thunderstorm-  
430 related asthma: what happens and why. *Clin. Exp. Allergy*, 46, 390–96.

431 D'Amato, G., Annesi Maesano, I., Molino, A., Vitale, C. and D'Amato, M. (2017).  
432 Thunderstorm-related asthma attacks. *J. Allergy Clin. Immunol.*, 139, 1786–87.

433 Dales R. E., Cakmak S., Judek S., *et al.*, 2003. The role of fungal spores in  
434 thunderstorm asthma. *Chest*, 123, 745–750.

435 Diffenbaugh N. S., Scherer M. and Trapp, R. J., (2013). Robust increases in severe  
436 thunderstorm environments in response to greenhouse forcing. *Proc. Natl. Acad Sci.*,  
437 101:16,361–6. doi:10.1073/pnas.1307758110.

438 Girgis ST, Marks GB, Downs SH, et al., (2000). Thunderstorm associated asthma  
439 in an inland town in south-eastern Australia. Who is at risk? *Eur. Respir. J.*, 16:3–8.

440 Gleason, J. A., L. Bielroy and J. A. Fagliano (2014). Associations between ozone,  
441 PM2.5, and four pollen types on emergency department pediatric asthma events during  
442 the warm season in New Jersey: A case-cross over study. *Environ. Res.*, 132, 421-429.

443 Krausmann, E., Renni, E., Campedel, M. (2011). Industrial accidents triggered  
444 by earthquakes, floods and lightning: lessons learned from a database analysis. *Nat*  
445 *Haz.*, 59: 285. <https://doi.org/10.1007/s11069-011-9754-3>

446 Keinan, N. (1992), Comparison of pollen allergenicity of closely related plant  
447 populations and species. Ph.D. dissertation, Tel-Aviv University, 115 pp (in Hebrew).

448 Lynn, B. and Yair, Y. (2010), Prediction of lightning flash density with the WRF  
449 model, *Adv. Geosci.*, 23, 11-16, doi:10.5194/adgeo-23-11-2010.

450 Lynn, B., Y. Yair, C. Price, G. Kelman and A. J. Clark (2012). Predicting Cloud-  
451 to-Ground and Intracloud Lightning in Weather Forecast Models. *Weather and*  
452 *Forecasting*, 27, 1470-1488, doi:10.1175/WAF-D-11-00144.1.

453 Marks G. B., Colquhoun J. R., Girgis S. T., et al., 2001. Thunderstorm outflows  
454 preceding epidemics of asthma during spring and summer. *Thorax*, 56:468–471

455 Miguel, A. G., P. E. Taylor, James House, E. M. Glovsky and R. C. Flagan 2006).  
456 Meteorological influences on respirable fragment release from Chinese Elm  
457 pollen, *Aer. Sci. Tech.*, 40:9, 690-696, doi: 10.1080/02786820600798869

458 Molfino N. A., Wright S. C., Katz I., Tarlo S., Silverman F., McClean P. A. et al.,  
459 1991. Effect of low concentrations of ozone on inhaled allergen responses in asthmatic  
460 subjects. *Lancet*; 338:199–203.

461 Nasser S. M. and T.B. Pulimood, 2009. Allergens and thunderstorm asthma. *Curr.*  
462 *Allergy Asthma Rep.*, 9 (5), pp. 384-390, doi:10.1007/s11882-009-0056-8.

463 Newson R., Strachan D. P., Archibald E., et al. (1997), Effect of thunderstorms  
464 and airborne grass pollen on the incidence of acute asthma in England, 1990–  
465 1994. *Thorax*, 52, 680–685.



466       Packe, G. E., and Ayres, J. (1985). Asthma outbreak during a thunderstorm. *The*  
467 *Lancet*, 326 (8448), 199-204.

468       Packe, G. E., and Ayres, J. (1986). Aeroallergen skin sensitivity in patients with  
469 severe asthma during a thunderstorm. *The Lancet*, 327 (8485), 851-852.

470       Pawar, S.D., V. Gopalakrishnan, P. Murugavel, N. E. Veremey and A. A.  
471 Sinkevich, 2017. Possible role of aerosols in the charge structure of isolated  
472 thunderstorms. *Atmos. Res.*, 183, 331-340.

473       Petrucci, O., L.Aceto, C.Bianchi, V.Bigot, R. Brázdil, S.Pereira, A.Kahraman,  
474 Ö.Kılıç, V.Kotroni, M.C. Llasat, M. Llasat-Botija, K. Papagiannaki, A. A. Pasqua, J.  
475 Řehoř, J. Rossello Geli, P. Salvati, F. Vinet, J.L. Zêzere, 2019. Flood Fatalities in  
476 Europe, 1980–2018: Variability, Features, and Lessons to Learn. *Water* 2019, 11, 1682;  
477 doi:10.3390/w11081682

478       Rossi O. V. J., Kinnula V. L., Tienari J. and Huhti E., 1993. Association of severe  
479 asthma attacks with weather, pollen, and air pollutants. *Thorax*, 48:244–8.

480       Romps et al. (2014), Projected increase in lightning strikes in the United States due  
481 to global warming. *Science*, 346, 6211, 851-854.

482       Saaroni, H., E. Levi and B. Ziv (2018), Particulate matter in the summer season  
483 and its relation to synoptic conditions and regional climatic stress – the case of Haifa,  
484 Israel. *Water, air, soil poll.*, 229, 313. doi: 10.1007/s11270-018-3943-6.

485       Shalev, S., Saaroni, H., Izsak, T., Yair, Y. and Ziv, B. (2011), The spatiotemporal  
486 distribution of lightning over Israel and the neighboring area and its relation to regional  
487 synoptic systems, *Nat. Hazards Earth Syst. Sci.*, 11, 2125–2135, doi:10.5194/nhess-11-  
488 2125-2011.

489       Silver JD, Sutherland MF, Johnston FH, Lampugnani ER, McCarthy MA, Jacobs  
490 SJ, et al. (2018) Seasonal asthma in Melbourne, Australia, and some observations on  
491 the occurrence of thunderstorm asthma and its predictability. *PLoS ONE* 13(4):  
492 e0194929. <https://doi.org/10.1371/journal.pone.0194929>

493       Singer, B. D., L. H. Ziska, D. A. Frenz, D. E. Gebhard and J. G. Straka (2005).  
494 Increasing Amb a 1 content in common ragweed (*Ambrosia artemisiifolia*) pollen as a  
495 function of rising atmospheric CO<sub>2</sub> concentrations. *Functional Plant Biology*, 32, 667-  
496 670.

497       Sofiev, M., Siljamo, P., Ranta, H., Linkosalo, T., Jaeger, S., Rasmussen, A., Rantio-  
498 Lehtimäki, A., Severova, E., and Kukkonen, J. (2013). A numerical model of birch  
499 pollen emission and dispersion in the atmosphere. Description of the emission module,  
500 *Int. J. Biometeorol.*, 57, 45–58, doi:10.1007/s00484-012-0532-z.

501       Suphioglu, C. (1998). Thunderstorm asthma due to grass pollen. *Int. Arch. Allergy*  
502 *and Immunology*, 116(4), 253-260.

503       Taylor, P. E., Flagan, R. C., Miguel, A. G., Valenta, R. and Glovsky, M. M. (2004a),  
504 Birch pollen rupture and the release of aerosols of respirable allergens. *Clinical &*  
505 *Experimental Allergy*, 34: 1591-1596. doi:[10.1111/j.1365-2222.2004.02078.x](https://doi.org/10.1111/j.1365-2222.2004.02078.x)Taylor,  
506 P. E. and H. Jonsson (2004b). Thunderstorm asthma. *Curr. Allergy Asthma Rep.*, 4, 5,  
507 409-413, doi: 10.1007/s11882-004-0092-3

508       Thien, F., Beggs, P. J., Csutoros, D., Darvall, J., Hew, M., Davies, J. M. and Byrne,  
509 T. (2018). The Melbourne epidemic thunderstorm asthma event 2016: an investigation  
510 of environmental triggers, effect on health services, and patient risk factors. *The Lancet*  
511 *Planetary Health*, 2(6), e255-e263.

512       Trapp, R. J., N. S. Diffenbaugh, H. E. Brooks, M. E. Baldwin, E.D. Robinson and J.  
513 S. Pal, (2007). Changes in severe thunderstorm environment frequency during the 21st  
514 century caused by anthropogenically enhanced global radiative forcing. *Proc. Nat. Ac.*  
515 *Sci.*, (50) 19719-19723; DOI:10.1073/pnas.0705494104

516 Vaidyanathan, V., Miguel, A. G., Taylor, P. E., Flagan, R. C., & Glovsky, M. M.  
517 (2006). Effects of electric fields on pollen rupture. *Journal of Allergy and Clinical*  
518 *Immunology*, 117(2) doi:http://dx.doi.org/10.1016/j.jaci.2005.12.625

519 Venables KM, Allitt U, Collier CG, Emberlin J, Greig JB, Hardaker PJ, Highham  
520 JH, Laing–Morton T, Maynard RL, Murray V, Strachan D, Tee RD: Thunderstorm–  
521 related asthma – The epidemic of 24/25 June 1994. *Clin Exp Allergy* 1997;27:725–736.

522 Waisel, Y., Ganor, E., Glikman, M., Epstein, V., & Brenner, S., (1997). Seasonal  
523 distribution of airborne pollen in the coastal plain of Israel. *Aerobiologia*, 13, 127–134.

524 Waisel, Y., Eshel, A., Keynan, N., & Langgut, D. (2008). Ambrosia: A new  
525 impending disaster for the Israeli allergic population. *Israel Medical Association*  
526 *Journal*, 10, 856–857.

527 Wardman A. E., Stefani D. and J. C. MacDonald (2002), Thunderstorm associated  
528 asthma or shortness of breath epidemic: a Canadian case report. *Can Respir J.*, 9, 267–  
529 270.

530 Williams, E. R., N. Nathou, E. Hicks, C. Pontikis, B. Russell, M. Miller and M. J.  
531 Bartholmew, (2007), The electrification of dust-lofting gust fronts ('haboobs') in the  
532 Sahel. *Atmos. Res.*, 91, 2-4, 292-298.

533 Yair, Y., Z. Levin and O. Altaratz (1998). Lightning phenomenology in the Tel-  
534 Aviv area from 1989 to 1996. *J. Geophys. Res.*, 103, D8, 9015-9025.

535 Yair, Y., S. Shalev, Z. Erlich, A. Agrachov, E. Katz, H. Saaroni, C. Price and B.  
536 Ziv, 2014. Lightning flash multiplicity in eastern Mediterranean winter thunderstorms.  
537 *Nat. Hazards Earth Syst. Sci.*, 14, 165-173, doi:10.5194/nhess-14-165-2014.

538 Yair, Y., Sibony, M., and Rubin, B. (2017). Four *Ambrosia* species in Israel:  
539 Invasive, naturalized and casual alien plants. *Israel J. Plant Sci.*, 64, 93–98.

540 Yair, Y., (2018), Lightning hazards to human societies in a changing climate.  
541 *Environ. Res. Lett.*, 13, 123002, doi: 10.1088/1748-9326/aaea86

542 Yair, Y., Sibony M, Goldberg A, Confino-Cohen R, Rubin B. and E. Shahr (2018).  
543 Ragweed species (*Ambrosia* spp.) in Israel: Distribution and allergenicity.  
544 *Aerobiologia*, doi.org/10.1007/s10453-018-9542-6

547 Zhang, R. T. Duhl, M. T. Salam, J. M. House, R. C. Flagan, E. L. Avol, F. D.  
548 Gilliland, A. Guenther, S. H. Chung, B. K. Lamb and T. M. VanReken (2014).  
549 Development of a regional-scale pollen emission and transport modeling framework  
550 for investigating the impact of climate change on allergic airway disease. *Biogeosci.*,  
551 11,1461-1478.

552 Ziv, B., H. Saaroni, Y. Yair, M. Ganot, H. Baarad and D. Isaschari (2008),  
553 Atmospheric factors governing winter thunderstorms in the coastal regions of the  
554 eastern Mediterranean. *Theor. Appl. Clim.*, 10.1007/s00704-008-0008-6.

555 Ziska, L. H. et al. (2011). Recent warming by latitude associated with increased  
556 length of ragweed pollen season in central North America. *Proc. Nat. Acad. Sci.*, 108,  
557 4248-4251.

558

559

560 **Figure Captions**

561

562 **Figure 1:** A schematic description of the mechanism that enhances the concentrations  
563 of airborne aerosols (either pollution particles or pollen) ahead of a mature  
564 thunderstorm (Taylor and Jonsson, 2004).

565

566 **Figure 2:** Wind speed at 4 different stations along Israel. Bet Dagan (in blue) is located  
567 12 km southeast of Tel-Aviv. Hadera Port (red) is located on the coastline, 45 km north  
568 of Tel-Aviv. Hakfar Hayarok (green) is 5 km northeast of Tel-Aviv, and Tel-Aviv coast  
569 (purple) is located on the Mediterranean coastline. All stations recorded an abrupt and  
570 short-lived increase in wind-speed around 10 AM local time, indicating the passage of  
571 the gust front. Data courtesy the Israeli Meteorological Service.

572

573 **Figure 3:** (left) Visible MODIS Satellite image at 12 UT when the cold front and  
574 thunderstorms already moved into Israel (right) Lightning strokes detected on October  
575 25<sup>th</sup> 2015 by the ILDN (Israel Lightning Detection Network) operated by the Israeli  
576 Electrical Corporation. Each point is a ground stroke. The panels show cumulative  
577 values at 30 minutes intervals, local time indicated and the location of the 3 hospitals  
578 involved in this research.

579

580 **Figure 4:** 1-minute accumulated lightning numbers detected on October 25<sup>th</sup> 2015 as a  
581 function of time. The total cloud-to-ground stroke rate (grey) exhibits a sharp maximum  
582 around 09:45 local time, as the cells passed over central Israel.

583

584 **Figure 5:** Mass concentration of PM10 aerosols for 16 stations in Israel, 25<sup>th</sup> October  
585 2015. Data is given in  $\mu\text{g m}^{-3}$ . Note the peak around 1000 local time, coinciding with  
586 the passage of the gust front. The sharp, strong peak was measured at the Rambam  
587 Medical Center in Haifa.

588

589 **Figure 6:** Daily average concentrations of pollen and spore numbers for October 2015,  
590 based on data collected at Tel-Aviv University's monitoring station in the botanical  
591 gardens on campus (Data courtesy of Prof. Amram Eshel, the Laboratory for Pollen  
592 Monitoring, Tel-Aviv University).

593

594 **Figure 7:** Emergency room presentations at 3 Israeli hospitals in the 3 days preceding  
595 and following the October 25<sup>th</sup> 2015 super-cell event: Meir Medical center (blue),  
596 Rambam medical center (orange), HaEmek medical center (grey).

597

598 **Figure 8:** Two months of ER presentations of patients with respiratory problems at the  
599 Meir Medical Center in Kfar-Saba, central Israel (for the period 1.10.2015-30.11.2015).  
600 The October 25<sup>th</sup> record shows a 250% increase in a single day.

601

602



604 **Appendix A**

605

606 Table showing flowering months for various allergenic plants in Israel (based on

607 Keinan, 1992). Yellow marks little flowering, dark brown marks massive flowering.

608

|                                | 1      | 2          | 3          | 4          | 5          | 6          | 7          | 8          | 9          | 10         | 11         | 12         |
|--------------------------------|--------|------------|------------|------------|------------|------------|------------|------------|------------|------------|------------|------------|
| <i>Cynodon dactylon</i>        | Yellow | Yellow     | Dark Brown | Dark Brown | Dark Brown | Dark Brown | Dark Brown | Dark Brown | Dark Brown | Yellow     | Yellow     | Yellow     |
| <i>Hyparrhenia hirta</i>       | Yellow | Yellow     | Dark Brown | Dark Brown | Dark Brown | Dark Brown | Dark Brown | Dark Brown | Dark Brown | Yellow     | Yellow     | Yellow     |
| <i>Pennisetum clandestinum</i> | Yellow | Dark Brown | Dark Brown | Dark Brown | Dark Brown | Dark Brown | Dark Brown | Dark Brown | Dark Brown | Yellow     | Yellow     | Yellow     |
| <i>Stenotaphrum secundatum</i> | Yellow | Yellow     | Dark Brown | Dark Brown | Dark Brown | Dark Brown | Dark Brown | Dark Brown | Dark Brown | Yellow     | Yellow     | Yellow     |
| <i>Paspalum vaginatum</i>      | Yellow | Yellow     | Dark Brown | Dark Brown | Dark Brown | Dark Brown | Dark Brown | Dark Brown | Dark Brown | Dark Brown | Yellow     | Yellow     |
| <i>Zoisia sp.</i>              | Yellow | Yellow     | Dark Brown | Dark Brown | Dark Brown | Dark Brown | Dark Brown | Dark Brown | Dark Brown | Dark Brown | Dark Brown | Yellow     |
| <i>Sorghum halepense</i>       | Yellow | Yellow     | Dark Brown | Dark Brown | Dark Brown | Dark Brown | Dark Brown | Dark Brown | Dark Brown | Yellow     | Yellow     | Yellow     |
| <i>Chloris gayana</i>          | Yellow | Yellow     | Dark Brown | Dark Brown | Dark Brown | Dark Brown | Dark Brown | Dark Brown | Dark Brown | Yellow     | Yellow     | Yellow     |
| <i>Poa sp.</i>                 | Yellow | Yellow     | Dark Brown | Dark Brown | Dark Brown | Yellow     | Yellow     | Yellow     | Yellow     | Yellow     | Yellow     | Yellow     |
| <i>Hordeum sp.</i>             | Yellow | Yellow     | Dark Brown | Dark Brown | Dark Brown | Yellow     | Yellow     | Yellow     | Yellow     | Yellow     | Yellow     | Yellow     |
| <i>Lolium sp.</i>              | Yellow | Yellow     | Dark Brown | Dark Brown | Dark Brown | Yellow     | Yellow     | Yellow     | Yellow     | Yellow     | Yellow     | Yellow     |
| <i>Bromus sp.</i>              | Yellow | Yellow     | Dark Brown | Dark Brown | Dark Brown | Yellow     | Yellow     | Yellow     | Yellow     | Yellow     | Yellow     | Yellow     |
| <i>Dactylis glomerata</i>      | Yellow | Yellow     | Dark Brown | Dark Brown | Dark Brown | Yellow     | Yellow     | Yellow     | Yellow     | Yellow     | Yellow     | Yellow     |
| <i>Avena sp.</i>               | Yellow | Yellow     | Dark Brown | Dark Brown | Dark Brown | Yellow     | Yellow     | Yellow     | Yellow     | Yellow     | Yellow     | Yellow     |
| <i>Parietaria sp.</i>          | Yellow | Yellow     | Dark Brown | Dark Brown | Dark Brown | Dark Brown | Dark Brown | Dark Brown | Dark Brown | Yellow     | Yellow     | Yellow     |
| <i>Ricinus communis</i>        | Yellow | Yellow     | Dark Brown | Dark Brown | Dark Brown | Dark Brown | Dark Brown | Dark Brown | Dark Brown | Yellow     | Yellow     | Yellow     |
| <i>Chenopodium sp.</i>         | Yellow | Yellow     | Dark Brown | Dark Brown | Dark Brown | Dark Brown | Dark Brown | Dark Brown | Dark Brown | Yellow     | Yellow     | Yellow     |
| <i>Urtica sp.</i>              | Yellow | Dark Brown | Dark Brown | Dark Brown | Dark Brown | Yellow     | Yellow     | Yellow     | Yellow     | Yellow     | Yellow     | Yellow     |
| <i>Mercurialis annua</i>       | Yellow | Dark Brown | Dark Brown | Dark Brown | Dark Brown | Yellow     | Yellow     | Yellow     | Yellow     | Yellow     | Yellow     | Yellow     |
| <i>Plantago sp.</i>            | Yellow | Yellow     | Dark Brown | Dark Brown | Dark Brown | Yellow     | Yellow     | Yellow     | Yellow     | Yellow     | Yellow     | Yellow     |
| <i>Amaranthus sp.</i>          | Yellow | Yellow     | Dark Brown | Dark Brown | Dark Brown | Dark Brown | Dark Brown | Dark Brown | Dark Brown | Yellow     | Yellow     | Yellow     |
| <i>Inula viscosa</i>           | Yellow | Yellow     | Dark Brown | Dark Brown | Dark Brown | Dark Brown | Dark Brown | Dark Brown | Dark Brown | Dark Brown | Yellow     | Yellow     |
| <i>Ambrosia sp.</i>            | Yellow | Yellow     | Dark Brown | Dark Brown | Dark Brown | Dark Brown | Dark Brown | Dark Brown | Dark Brown | Dark Brown | Yellow     | Yellow     |
| <i>Xanthium sp.</i>            | Yellow | Yellow     | Dark Brown | Dark Brown | Dark Brown | Dark Brown | Dark Brown | Dark Brown | Dark Brown | Yellow     | Yellow     | Yellow     |
| <i>Salsola kali</i>            | Yellow | Yellow     | Dark Brown | Dark Brown | Dark Brown | Dark Brown | Dark Brown | Dark Brown | Dark Brown | Dark Brown | Yellow     | Yellow     |
| <i>Atriplex halimus</i>        | Yellow | Yellow     | Dark Brown | Dark Brown | Dark Brown | Dark Brown | Dark Brown | Dark Brown | Dark Brown | Dark Brown | Yellow     | Yellow     |
| <i>Artemisia monosperma</i>    | Yellow | Yellow     | Dark Brown | Dark Brown | Dark Brown | Dark Brown | Dark Brown | Dark Brown | Dark Brown | Dark Brown | Yellow     | Yellow     |
| <i>Artemisia herba alba</i>    | Yellow | Yellow     | Dark Brown | Dark Brown | Dark Brown | Dark Brown | Dark Brown | Dark Brown | Dark Brown | Dark Brown | Dark Brown | Yellow     |
| <i>Eucalyptus sp.</i>          | Yellow | Yellow     | Dark Brown | Dark Brown | Dark Brown | Dark Brown | Dark Brown | Dark Brown | Dark Brown | Dark Brown | Dark Brown | Dark Brown |
| <i>Thuja sp.</i>               | Yellow | Dark Brown | Dark Brown | Dark Brown | Dark Brown | Dark Brown | Dark Brown | Dark Brown | Dark Brown | Dark Brown | Dark Brown | Dark Brown |
| <i>Cupressaceae</i>            | Yellow | Dark Brown | Dark Brown | Dark Brown | Dark Brown | Dark Brown | Dark Brown | Dark Brown | Dark Brown | Dark Brown | Dark Brown | Dark Brown |
| <i>Phoenix dactylifera</i>     | Yellow | Dark Brown | Dark Brown | Dark Brown | Dark Brown | Dark Brown | Dark Brown | Dark Brown | Dark Brown | Dark Brown | Dark Brown | Dark Brown |
| <i>Quercus ithaburensis</i>    | Yellow | Yellow     | Dark Brown | Dark Brown | Dark Brown | Dark Brown | Dark Brown | Dark Brown | Dark Brown | Dark Brown | Dark Brown | Dark Brown |
| <i>Quercus calliprinos</i>     | Yellow | Yellow     | Dark Brown | Dark Brown | Dark Brown | Dark Brown | Dark Brown | Dark Brown | Dark Brown | Dark Brown | Dark Brown | Dark Brown |
| <i>Pistacia lentiscus</i>      | Yellow | Dark Brown | Dark Brown | Dark Brown | Dark Brown | Dark Brown | Dark Brown | Dark Brown | Dark Brown | Dark Brown | Dark Brown | Dark Brown |
| <i>Pistacia palaestina</i>     | Yellow | Yellow     | Dark Brown | Dark Brown | Dark Brown | Dark Brown | Dark Brown | Dark Brown | Dark Brown | Dark Brown | Dark Brown | Dark Brown |
| <i>Olea europaea</i>           | Yellow | Yellow     | Dark Brown | Dark Brown | Dark Brown | Dark Brown | Dark Brown | Dark Brown | Dark Brown | Dark Brown | Dark Brown | Dark Brown |
| <i>Acacia sp.</i>              | Yellow | Yellow     | Dark Brown | Dark Brown | Dark Brown | Dark Brown | Dark Brown | Dark Brown | Dark Brown | Dark Brown | Dark Brown | Dark Brown |
| <i>Carya illinoensis</i>       | Yellow | Yellow     | Dark Brown | Dark Brown | Dark Brown | Dark Brown | Dark Brown | Dark Brown | Dark Brown | Dark Brown | Dark Brown | Dark Brown |
| <i>Ailanthus glandulosa</i>    | Yellow | Yellow     | Dark Brown | Dark Brown | Dark Brown | Dark Brown | Dark Brown | Dark Brown | Dark Brown | Dark Brown | Dark Brown | Dark Brown |
| <i>Ceratonia siliqua</i>       | Yellow | Yellow     | Dark Brown | Dark Brown | Dark Brown | Dark Brown | Dark Brown | Dark Brown | Dark Brown | Dark Brown | Dark Brown | Dark Brown |
| <i>Schinus sp.</i>             | Yellow | Yellow     | Dark Brown | Dark Brown | Dark Brown | Dark Brown | Dark Brown | Dark Brown | Dark Brown | Dark Brown | Dark Brown | Dark Brown |
| <i>Casuarina sp.</i>           | Yellow | Yellow     | Dark Brown | Dark Brown | Dark Brown | Dark Brown | Dark Brown | Dark Brown | Dark Brown | Dark Brown | Dark Brown | Dark Brown |
